32 **Abstract**

33 Study examined molecular basis of energy-related regulatory mechanisms  
34 underlying metabolic recruitment of skeletal muscle during cold acclimation and  
35 possible involvement of the L-arginine/nitric oxide-producing pathway.

36 Rats exposed to cold ( $4\pm 1^\circ\text{C}$ ) for periods of 1, 3, 7, 12, 21, and 45 days were  
37 divided into three groups: untreated, L-arginine-treated and  $\text{N}^\omega$ -nitro-L-arginine methyl  
38 ester (L-NAME)-treated.

39 Compared to control ( $22\pm 1^\circ\text{C}$ ), there was an initial increase in the protein level  
40 of 5'-AMP-activated protein kinase  $\alpha$  (day 1), followed by an increase in peroxisome  
41 proliferator-activated receptor- $\gamma$  coactivator-1 $\alpha$  (PGC-1 $\alpha$ ) and peroxisome proliferator-  
42 activated receptors (PPARs): PPAR $\alpha$  and PPAR $\gamma$  from day 1 and PPAR $\delta$  from day 7 of  
43 cold acclimation. Activation of the PGC-1 $\alpha$ /PPAR transcription program was  
44 accompanied by increased protein expression of the key metabolic enzymes in  $\beta$ -  
45 oxidation, the tricarboxylic acid cycle and oxidative phosphorylation, with the exception  
46 in complex I (no changes) and ATP synthase (decreased at day 1). Cold did not affect  
47 hexokinase and GAPDH protein levels, but increased lactate dehydrogenase activity  
48 compared to control (1-45 days). L-arginine sustained, accelerated and/or intensified  
49 cold-induced molecular remodeling throughout cold acclimation. L-NAME exerted  
50 phase-dependent effects: similar to L-arginine in early cold acclimation and opposite  
51 after prolonged cold exposure (from day 21).

52 It seems that upregulation of the PGC-1 $\alpha$ /PPAR transcription program early on  
53 cold triggers molecular recruitment of skeletal muscle underlying the shift in its  
54 metabolism to more oxidative during prolonged cold acclimation. Our results suggest  
55 that nitric oxide has a role in maintaining skeletal muscle oxidative phenotype in late  
56 cold acclimation but question its role early on cold.

57

58 Abbreviations: ACADM, medium chain fatty acids acyl-CoA dehydrogenase; AMPK $\alpha$ ,  
59 5'-AMP-activated protein kinase  $\alpha$ ; GAPDH, glyceraldehyde-3-phosphate  
60 dehydrogenase; L-NAME,  $\text{N}^\omega$ -nitro-L-arginine methyl ester; NO, nitric oxide; NOS,  
61 nitric oxide synthase; OXPHOS, oxidative phosphorylation; PGC-1 $\alpha$ , peroxisome

62 proliferator-activated receptor- $\gamma$  coactivator-1 $\alpha$ ; PPARs, peroxisome proliferator-  
63 activated receptors; PYGB, glycogen phosphorylase; SCAS, succinyl-CoA synthetase.

64

65

66

67

68

69

70

71

72

73

74

75

76

77

78

79

80

81

82

83

84

85

86

87

88

89

90

91

92

93

94 **Introduction**

95 Skeletal muscle is recognized as an important player in the tissue triad, including  
96 brown and white adipose tissues, which plays an important role in maintaining energy  
97 homeostasis and body temperature in homeothermic animals. Shivering thermogenesis  
98 in skeletal muscle and non-shivering thermogenesis in brown adipose tissue are the  
99 major forms of thermogenesis in mammals (Heldmaier et al., 1989). White adipose  
100 tissue supplies skeletal muscle and brown adipose tissue with energy fuel and provides  
101 hormonal control of their thermogenic functions. Our previous study showed that  
102 structural and metabolic remodeling of brown (Petrovic et al., 2010; Vucetic et al.,  
103 2011) and white (Jankovic et al., 2013) adipose tissues are phase-dependent, reflecting  
104 their functional recruitment during 45-days of cold acclimation. In contrast to the clear  
105 role of skeletal muscle shivering thermogenesis in thermoregulation early in cold  
106 acclimation, its role during prolonged cold exposure, when non-shivering is activated, is  
107 not clear. Recent data showed that sustained cold exposure in animals with brown  
108 adipose tissue causes metabolic and structural changes in skeletal muscle indicating  
109 their shivering activity (Meyer et al., 2010; Mineo et al., 2012), similar to those  
110 observed following endurance exercise training (Schaeffer et al., 2003). It is known that  
111 shivering-related metabolic recruitment, in terms of fuel selection, can be achieved in  
112 three ways: i) by recruitment of specific subpopulations of fibers within the same  
113 muscle; ii) by recruitment of muscles varying in fiber composition and iii) by  
114 recruitment of different metabolic pathways within the same fibers.

115 Tight regulation of metabolic pathways involves the rapid modulation of the  
116 activity of specific proteins (enzymes, transporters), but also, on a long-term basis,  
117 changes in their quantity. This can be achieved by modulating their transcription rate  
118 through the action of specific transcription factors. The discovery of the peroxisome  
119 proliferator-activated receptor (PPAR) family of transcription factors and their co-  
120 activator (peroxisome proliferator-activated receptor- $\gamma$  coactivator-1 $\alpha$ , PGC-1 $\alpha$ )  
121 revealed the mechanism of the strong link between lipid/glucose availability and long-  
122 term metabolic adaptation. Three PPAR isoforms (PPAR $\alpha$ , PPAR $\gamma$  and PPAR $\delta$ ) have  
123 been identified to date (Mukherjee et al., 1997). The most abundant isoform in skeletal  
124 muscle is PPAR $\delta$ . It plays a role in the regulation of glucose and lipid uptake, handling

125 and oxidation (Holst et al., 2003). PPAR $\alpha$  and PPAR $\gamma$ , are less abundant in skeletal  
126 muscle in basal conditions, and may be alternatively implicated in the regulation of the  
127 same target genes in various physiological conditions, changing the homeostasis of  
128 metabolic substrates (exercise, fasting etc.) (Tunstall et al., 2002). However, data  
129 concerning their role in skeletal muscle during shivering and especially during sustained  
130 cold exposure are unclear.

131 In addition to exercise and thermogenesis, metabolic recruitment of skeletal  
132 muscle can be induced by some nutraceutical agents, including L-arginine. In skeletal  
133 muscle, L-arginine regulates glucose uptake and oxidation, fatty acids oxidation (Jobgen  
134 et al., 2006), mitochondriogenesis (Puigserver et al., 1998), contractile function  
135 (Joneschild et al., 1999; Marechal and Gailly, 1999) and blood flow (Brevetti et al.,  
136 2003). L-arginine is the precursor for nitric oxide (NO) synthesis. In accordance,  
137 supplementation of L-arginine is widely used approach to examine metabolic effects of  
138 NO. Such studies are usually complemented with the use of N<sup>ω</sup>-nitro-L-arginine-methyl  
139 ester (L-NAME), inhibitor of nitric oxide synthases in order to confirm NO-dependency  
140 of L-arginine effects.

141 In the present study, we extended our research with the aim of characterizing  
142 key bioenergetic pathways and their regulation in skeletal muscle during cold  
143 acclimation. To this end, the expression profile of PPAR isoforms and PGC-1 $\alpha$ , along  
144 with the key enzymes in glucose and lipid metabolism and ATP production were  
145 examined. To complete the picture regarding the role of the L-arginine-NO pathway in  
146 the regulation of oxidative metabolism during cold acclimation, rats were treated with  
147 the NO-manipulating agents, L-arginine and L-NAME.

148  
149  
150  
151  
152  
153  
154  
155  
156

157 **Methods**

158

159 **Animals**

160 The experimental protocol was approved by the Ethical Committee for the  
161 treatment of experimental animals of the Institute for Biological Research, Belgrade,  
162 Serbia (certificate number: 05-09). The total number of 114 Mill Hill hybrid hooded, 4-  
163 month-old male rats *Rattus norvegicus* (Berkenhout 1769) were divided into two  
164 groups: a control group kept at room temperature ( $22 \pm 1^\circ\text{C}$ ) for the duration of the  
165 experiment, and a group maintained in the cold ( $4 \pm 1^\circ\text{C}$ ). The cold-acclimated group  
166 was divided into three subgroups: 1) untreated; 2) L-arginine-treated; 3) L-NAME-  
167 treated. Drugs were administered in drinking water, as 2.25% L-arginine-HCl or 0.01%  
168 L-NAME-HCl, as described previously (Saha et al., 1996; Petrovic et al., 2005; 2008).  
169 Rats were housed in individual plastic cages with drinking water and food *ad libitum*.  
170 The duration of cold-exposure ranged from one to 45 days (1, 3, 7, 12, 21, or 45 days),  
171 with six animals per experimental group. Body mass, food and fluid intake were  
172 recorded daily for each animal. The obtained data were previously reported (Petrovic et  
173 al., 2008).

174 At the end of the cold exposure period, animals were sacrificed by decapitation  
175 and the gastrocnemius dissected and rinsed with physiological saline to wash out traces  
176 of blood. Tissue samples were homogenized, using a Janke and Kunkel Ka/Werke  
177 Ultra/Turrax homogenizer, for lactate dehydrogenase (LDH) activity determination at 0  
178 -  $4^\circ\text{C}$  in 0.25 M sucrose, 0.1 mM EDTA and 50 mM Tris buffer, at pH 7.4 and  
179 sonicated.

180

181 **SDS-PAGE and Western blotting**

182 Western blots were conducted as described previously (Petrovic et al., 2010),  
183 using antibodies against: *Ndufa9* subunit of complex I ( $2.5 \mu\text{g ml}^{-1}$ ), cytochrome *c* ( $2 \mu\text{g}$   
184  $\text{ml}^{-1}$ ), ATP synthase ( $0.8 \mu\text{g ml}^{-1}$ ), hexokinase II (1:5000), glyceraldehyde-3-phosphate  
185 dehydrogenase (GAPDH; 1:500), medium chain fatty acids acyl-CoA dehydrogenase  
186 (ACADM; 1:10000), succinyl-CoA synthetase (SCAS, 1:1000), beta actin (1:1000) (all  
187 purchased from Abcam, Cambridge, UK), phospho 5'-AMP-activated protein kinase  $\alpha$   
188 (AMPK $\alpha$ ,  $2 \mu\text{g ml}^{-1}$ ) (Milipore International, Billerica, MA, USA) and for glycogen

189 phosphorylase (PYGB, 1:1000) (Santa Cruz Biotechnology, Santa Cruz, CA, USA).  
190 Quantitative analysis of immunoreactive bands was conducted with ImageQuant  
191 software. Volume was the sum of all the pixel intensities within a band, *i.e.*, 1 pixel =  
192 0.007744 mm<sup>2</sup>. We averaged the ratio of dots per band for the target protein and actin in  
193 corresponding time-periods, from three similar independent experiments, and expressed  
194 them relative to the room temperature acclimated control, which was standardized as  
195 100%. Data were then statistically analyzed.

196

#### 197 LDH activity

198 LDH activity was tested (Borgmann et al., 1974) and enzymatic activity was  
199 expressed as U mg<sup>-1</sup> protein. The reaction velocity was determined by the decrease in  
200 absorbance at 340 nm, which resulted from the oxidation of NADH. One unit caused the  
201 oxidation of 1 μmol of NADH per minute at 25 °C at pH 7.4, under the specified  
202 conditions.

203

#### 204 Additional assays and statistical analysis

205 Protein content was estimated using bovine serum albumin as a reference  
206 (Lowry et al., 1951). Analysis of variance (ANOVA) was used to test within-group  
207 comparisons. If the F test indicated an overall difference, Tukey's test was applied to  
208 evaluate the significance of the differences. Statistical significance was set at  $P < 0.05$ .

209

## 210 **Results**

211

### 212 Expression patterns of PGC-1α and PPAR isoforms

213 As shown in Fig. 1, compared to the control, cold induced an increase in the  
214 protein level of PGC-1α from day 3 (A), PPARδ from day 7 (B) and both PPARα (C)  
215 and PPARγ (D) at all examined time points (from day 1 to day 45). L-arginine treatment  
216 accelerated and intensified the increase in PGC-1α protein levels, thus the protein level  
217 of this transcriptional coactivator was higher than the control throughout cold  
218 acclimation and higher than the untreated group at day 1, 3, 7 and 45. Also, L-arginine  
219 increased the protein level of PPARα additionally during cold acclimation throughout

220 the entire 45-day period. PPAR $\gamma$  was increased compared to the untreated groups at day  
221 12, 21 and 45 during cold acclimation. In contrast to L-arginine, the effects of L-NAME  
222 were different in the early and late period of cold acclimation. On day 1, the protein  
223 levels of PPARs were higher in the L-NAME-treated group than in the control and  
224 untreated groups. However, L-NAME subsequently induced a decrease in the  
225 expression of PGC-1 $\alpha$  and PPARs compared to untreated groups: PGC-1 $\alpha$  and PPAR $\delta$   
226 at day 21 and 45 and PPAR $\gamma$  at day 45. PPAR $\alpha$  protein levels were lower than those  
227 observed in the control and untreated groups starting from day 12 to the end of cold  
228 acclimation (day 45).

229

230 Changes in the expression of the components of the electron transport chain and ATP  
231 synthesis

232 In contrast to complex I (A) which showed no changes in expression during cold  
233 acclimation, cytochrome *c* protein content (B) was increased compared to the control  
234 throughout the period of cold acclimation, while after an slightly initial decrease in the  
235 protein level of ATP synthase (C) at day 1, an increase from day 3 to day 21 was  
236 observed (Fig. 2). In the L-arginine-treated group, the protein expression of complex I  
237 and cytochrome *c* was significantly increased compared to the control and untreated  
238 cold-acclimated animals throughout the entire cold acclimation period. In addition,  
239 treatment with L-arginine restored, and even increased the cold-induced slightly  
240 decrease in protein content of ATP synthase at day 1 and 45 compared with the control  
241 and untreated groups. In contrast to the similar trend in L-arginine action in all the  
242 examined components of the electron transport chain and ATP synthesis, the effects of  
243 L-NAME showed specificity related to the molecule. Complex I protein content was  
244 significantly decreased compared to the control and untreated groups during the  
245 acclimation period after L-NAME treatment. The effects of L-NAME on cytochrome *c*  
246 and ATP synthase showed phase-specificity. Initially during cold acclimation, the  
247 effects of L-NAME were similar to those of L-arginine: cytochrome *c* protein level  
248 (from day 1 to day 21) was higher than that observed in the control and untreated  
249 groups, and ATP synthase protein expression was restored to the control level at day 1.  
250 However, the protein level of cytochrome *c* was subsequently (day 45) lower in L-



251 NAME-treated animals compared to untreated animals, while the expression of ATP  
252 synthase decreased compared to both untreated animals (day 12 and 21) and the control  
253 (day 45).

254

255 Changes in enzymes involved in glucose metabolism

256 Fig. 3 summarizes the results of the protein expression patterns (A, B, C) and the  
257 activity (D) of the enzymes involved in glucose metabolism. It can be seen that GAPDH  
258 protein level (A) was not affected by either cold, L-arginine or L-NAME treatment.  
259 Similarly, hexokinase II protein level (B) was unchanged during cold acclimation, while  
260 PYGB protein content (C) was decreased compared to the control during early cold  
261 acclimation (day 1 and 3). L-arginine treatment restored the cold-induced decrease in  
262 protein level of PYGB during early cold acclimation and its expression was  
263 significantly higher than that in the control and untreated animals throughout the entire  
264 45-day cold acclimation period. In contrast, the protein level of hexokinase II was  
265 upregulated after only 1 day of L-arginine treatment during cold acclimation. Acting in  
266 a similar manner to L-arginine, L-NAME initially induced an increase in PYGB protein  
267 content compared to untreated animals from day 1 to day 12 of cold acclimation. In  
268 contrast, hexokinase II protein level was lower in L-NAME-treated rats compared to the  
269 control and untreated animals during early cold acclimation (day 1 and 3).

270 Cold acclimation induced an increase in LDH activity compared to the control  
271 (except at the 12-day time period) (Figure 3D). L-arginine treatment did not affect cold-  
272 induced changes in LDH activity, however, L-NAME treatment diminished the effects  
273 of cold acclimation on day 1, 7 and 21, i.e. at these time points LDH activity was lower  
274 than that in untreated cold-acclimated animals.

275

276 Expression patterns of enzymes involved in lipid metabolism and the Krebs cycle

277 It can be seen from Fig. 4 that ACADM protein content (A) was increased at  
278 day 3, 7, 21 and 45 of cold acclimation, while the protein level of SCAS (B) was higher  
279 than that in the control throughout the entire cold acclimation period. L-arginine  
280 treatment sustained the cold-induced increase in ACADM protein level starting from  
281 day 3 of cold acclimation and intensified the cold effects at day 12 and 21. However, L-  
282 arginine reduced the effect of cold on SCAS protein expression, decreasing the level to

283 below that of the control. The expression pattern of ACADM in the L-NAME-treated  
284 groups was similar to that observed in the L-arginine-treated groups up to day 21 of cold  
285 acclimation, however, 45 days of L-NAME treatment induced a significant decrease in  
286 ACADM protein level compared to the control and untreated group. L-NAME sustained  
287 the cold-induced increase in the protein level of SCAS from day 1 to day 7 of cold  
288 acclimation, but induced a significant decrease in SCAS protein level during late cold  
289 acclimation (12 and 45 days).

290

291 Expression profile of phospho-AMPK $\alpha$

292 The protein content of phospho-AMPK $\alpha$  showed phase-dependent changes  
293 during cold acclimation (Fig. 5). Compared to the control, during early cold acclimation  
294 (1 and 3 days) phospho-AMPK $\alpha$  protein expression was significantly increased, while  
295 during late cold acclimation (12 and 45 days) the level was below that of the control. L-  
296 arginine induced an additional increase in phospho-AMPK $\alpha$  protein levels throughout  
297 the entire cold acclimation period. The effect of L-NAME was similar to the effect of L-  
298 arginine during early cold acclimation (1-12 days), but had the opposite effect during  
299 late cold acclimation (day 21 and 45), where the protein content of phospho-AMPK $\alpha$   
300 was significantly lower than that in the control and untreated groups.

301

## 302 Discussion

303 The present study provides data on the molecular basis of metabolic remodeling  
304 of skeletal muscle during the course of cold acclimation. Our results suggest that during  
305 early cold acclimation there was transcriptional activation that drives skeletal muscle  
306 metabolism to more oxidative and energy-effective, as increases in the protein levels of  
307 PGC-1 $\alpha$  and the three PPAR isoforms were coincident with increases in the key  
308 enzymes in lipid metabolism, the tricarboxylic acid cycle and oxidative phosphorylation  
309 (OXPHOS) from day 1 and 3 on cold. It seems that such metabolic perturbations are  
310 triggered by activation of AMPK $\alpha$ , given that the protein level of the phosphorylated  
311 form was increased at day 1 of cold acclimation. The observed molecular metabolic  
312 recruitment of skeletal muscle was maintained until the end of the examined period (45  
313 days) suggesting a role for skeletal muscle in the regulation of body temperature and/or

314 of whole-body metabolic homeostasis throughout cold acclimation. In addition, our  
315 results suggest that the L-arginine/NO producing pathway is important in supporting  
316 skeletal muscle metabolic remodeling in late cold acclimation.

317         During the course of early cold exposure, shivering thermogenesis is activated.  
318 To overcome exposure to cold, nerve stimulation induces permanent skeletal muscle  
319 contractions and relaxations. Therefore, this period may be seen as muscle training  
320 which is known to be an ATP-consuming process. Accordingly, we found an increased  
321 protein level of phospho-AMPK $\alpha$  (at day 1 and 3), a well-known energy sensor which  
322 when activated favors ATP producing pathways. Since LDH activity was markedly  
323 increased on day 1 it is likely that the energy demands of skeletal muscle at that time  
324 were dominantly accomplished through partial metabolism of glucose to lactate  
325 providing rapid ATP production. Our results also suggest that steady-state protein levels  
326 of hexokinase and GAPDH satisfied the constant flux of glucose through glycolytic  
327 pathways. However, the fact that protein level of ATP synthase was only slightly  
328 decreased at day 1 of cold acclimation suggests that oxidative phosphorylation also take  
329 a part in ATP production initially on cold.

330         In addition, it seems likely that AMPK $\alpha$ , through monitoring of perturbations in  
331 energy status in muscle during early cold acclimation (1 and 3 days), initiated molecular  
332 remodeling aimed at effectively responding to the energetic challenge in the long-term.  
333 This includes reprogramming of the skeletal muscle toward high-capacity fatty acids  
334 burning during cold acclimation, driven by the well-known transcriptional coactivators  
335 and factors, PGC-1 $\alpha$  and PPARs. The PGC-1 $\alpha$  protein level was increased throughout  
336 cold acclimation (45 days) starting from day 3 of cold exposure. This is in accordance  
337 with previous data which showed that both short-term (4 days) and long-term (4-5  
338 weeks) cold exposure induced PGC-1 $\alpha$  expression in skeletal muscle (Oliveira et al.,  
339 2004; Bruton et al., 2010). PGC-1 $\alpha$  regulates several key processes of adaptive  
340 thermogenesis in skeletal muscle including fuel utilization and switching, insulin  
341 sensitivity, glucose transport, gluconeogenesis and lipid oxidation, mitochondrial  
342 content and function, ATP synthesis and muscle fiber differentiation (Handschin et al.,  
343 2007; Jager et al., 2007;). PGC-1 $\alpha$  acts by increasing the expression and activation of  
344 various transcriptional factors including PPARs (Wu et al., 1999). Accordingly, we  
345 observed that upregulation of the protein level of PGC-1 $\alpha$  coincident with an increase in

346 the expression of PPAR $\alpha$  and PPAR $\gamma$  from day 3 and of PPAR $\delta$  from day 7 of cold  
347 acclimation. It was previously shown that cold exposure for 30 days increased the  
348 protein level of PPAR $\delta$  (Seebacher and Glanville, 2010). To our knowledge, this is the  
349 first data to show the effects of cold exposure on PPAR $\alpha$  and PPAR $\gamma$  expression in  
350 skeletal muscle, suggesting their role in respect to skeletal muscle metabolic remodeling  
351 during cold acclimation. Activation of different PPAR isoforms seems to have  
352 overlapping effects on fatty acids metabolism with similar molecular targets (including  
353 key regulatory enzymes in glucose and lipid metabolism, the tricarboxylic acid cycle  
354 and electron transport chain) (Ferre, 2004). Accordingly, we found that in parallel with  
355 upregulation of PPARs during cold acclimation, increases in the protein levels of key  
356 metabolic enzymes in  $\beta$ -oxidation (ACADM), the tricarboxylic acid cycle (SCAS) and  
357 oxidative phosphorylation pathways (cytochrome *c* and ATP synthase) were observed.

358 Thus, during early cold acclimation there is transcriptional and translational  
359 recruitment of skeletal muscle to support lipid-based thermogenesis and shivering. This  
360 suggests underlying mechanisms for increased lipid oxidation during early cold  
361 acclimation as reported by Vaillancourt et al. (2009). Lipids are the preferred metabolic  
362 fuel during periods of sustained submaximal exercise (McClelland et al., 2004) and  
363 shivering thermogenesis (Vaillancourt et al., 2009) due to their high contribution to total  
364 energy reserves in mammals (80%) and an energy density one order of magnitude  
365 greater than that of carbohydrates (Weber, 2011). In addition, our results suggest that an  
366 established molecular basis for increased skeletal muscle lipid-based oxidative  
367 metabolism was maintained until the end of the examined time period, when shivering  
368 decreased and non-shivering thermogenesis took place. These results are in accordance  
369 with our previous data which showed that from day 3 of cold acclimation there was a  
370 conspicuous increase in skeletal muscle catalase and glutathione peroxidase activities,  
371 enzymes that remove H<sub>2</sub>O<sub>2</sub> when levels increase due to increased  $\beta$ -oxidation (Petrovic  
372 et al., 2008). Such a shift toward lipid metabolism in skeletal muscle during prolonged  
373 cold exposure highlighted the physiological significance of our recently obtained data  
374 concerning white adipose tissue structural (Jankovic et al., 2009) and endocrine  
375 (Jankovic et al., 2013) remodeling during cold acclimation. In line with the role of fat  
376 tissue mobilization in response to skeletal muscle metabolic demand on cold,  
377 recruitment of lipid metabolism in skeletal muscle is coordinated with a significant

378 reduction in white adipose tissue mass (Jankovic et al., 2009). Tight cooperation of the  
379 two tissues in terms of overall metabolic changes during cold acclimation also involves  
380 an endocrine component, as adiponectin expression in white adipose tissue was  
381 upregulated at the same time point (after 3 days on cold). It has been well documented  
382 that the regulatory role of adiponectin on lipid and glucose metabolism in skeletal  
383 muscle involves the above-mentioned signaling cascade, including AMPK $\alpha$ , PPARs  
384 and their metabolic targets (Yoon et al., 2006; Amin et al., 2010).

385 Furthermore, our results suggest that along with increased lipid metabolism,  
386 PGC-1 $\alpha$ /PPARs signaling regulated the contribution of the glycolytic pathway in  
387 response to the energy demands of skeletal muscle during cold acclimation. The  
388 established molecular basis for glycolysis early on cold (upregulated LDH activity and  
389 unchanged hexokinase II and GAPDH protein levels on day 1) was maintained  
390 throughout the cold acclimation period in parallel with upregulation of the PGC-  
391 1 $\alpha$ /PPARs transcription program. Constant flux through the glycolytic pathway may be  
392 sustained by increased glucose uptake, observed previously in skeletal muscle of cold  
393 exposed and cold acclimated rats (Vallerand et al., 1990).

394 The present data, along with the results of other studies (Mayer et al., 2010;  
395 Mineo et al., 2012), demonstrate increased oxidative metabolism in skeletal muscle after  
396 prolonged cold exposure, however, the physiological significance and the contribution  
397 of shivering to total thermogenesis, when non-shivering is activated, remain to be  
398 elucidated. In addition, our results show a signaling cascade leading to the training  
399 phenotype of skeletal muscle, suggesting the potential benefit of prolonged cold  
400 exposure and potential molecular targets in the management of metabolic disorders  
401 including obesity and type II diabetes.

402 L-arginine treatment sustained the observed increase in LDH activity and  
403 accelerated and intensified cold-induced molecular metabolic remodeling of skeletal  
404 muscle to a more oxidative phenotype. The role of L-arginine in the regulation of  
405 skeletal muscle fuel metabolism at rest and exercise is well documented (Puigserver et  
406 al., 1998; Marechal and Gailly, 1999; Brevetti et al., 2003; Jobgen et al., 2006; Lee-  
407 Young et al., 2010). We also recently reported that L-arginine supplementation  
408 improves skeletal muscle antioxidative defense (Petrovic et al., 2008). The present study  
409 extends the data on the role of L-arginine in the regulation of skeletal muscle response

410 to metabolic demand during cold acclimation. L-arginine induced additional  
411 upregulation of OXPHOS complexes, i.e. increased protein level of complex I,  
412 cytochrome *c* and ATP synthase during cold acclimation starting on day 1. Such effects  
413 on mitochondrial oxidative metabolism by L-arginine were supported by increased  
414 protein expression of ACADM from day 12 on cold. In addition, L-arginine induced an  
415 increase in the protein level of hexokinase II on day 1, suggesting its involvement in the  
416 regulation of skeletal muscle response to shivering-related energy demand (mainly  
417 based on glucose) early on cold. It is likely that L-arginine improves the recruitment of  
418 stored glucose to support glucose utilization throughout cold acclimation, since  
419 glycogen breakdown regulating protein (glycogen phosphorylase B) was upregulated  
420 after L-arginine treatment at all examined time points during cold acclimation.

421 It seems that the effects of L-arginine are mediated by AMPK $\alpha$  since phospho-  
422 AMPK $\alpha$  protein level was increased throughout cold acclimation in L-arginine treated  
423 rats. The role of AMPK $\alpha$  signaling in mediating the effects of L-arginine in lipid  
424 oxidation and overall energy metabolism in skeletal muscle has been previously  
425 reported *in vitro* (de Castro Barbosa et al., 2012) and during exercise *in vivo* (Lee-  
426 Young et al., 2010). Our results suggest that, besides AMPK $\alpha$ , the L-arginine-induced  
427 signaling cascade driving skeletal muscle metabolism to more oxidative one on cold,  
428 included upregulation of co-transcriptional/transcriptional machinery based on PGC-1 $\alpha$   
429 and PPARs, since L-arginine accelerated and intensified the increase in PGC-1 $\alpha$  protein  
430 level and additionally increased PPAR $\alpha$  and PPAR $\gamma$  protein level during cold  
431 acclimation. Therefore, the action of L-arginine on molecules regulating fuel  
432 metabolism is coordinated to meet the energy requirements of skeletal muscle related to  
433 its role during cold acclimation.

434 At this stage, we are unable to define the contribution of NO to the observed  
435 effects of L-arginine. It is well known that all three isoforms of NO synthase, (NOS)  
436 endothelial (e), neuronal (n) and inducible (i), are expressed in skeletal muscle.  
437 Furthermore, Peralta et al. (2003) reported that mitochondrial NOS (mtNOS) is the  
438 major isoform in skeletal muscle which participates in the response to cold acclimation.  
439 Recently, de Castro Barbosa et al. (2012) provided direct evidence of the stimulatory  
440 effect of L-arginine on glucose and lipid metabolism in skeletal muscle which occurs via  
441 the NO/cGMP cascade. In the present study, during early cold acclimation the effects of

442 L-arginine and L-NAME on the examined regulatory proteins and metabolism-related  
443 enzymes were not consistent, and showed opposite or similar trends. However, during  
444 late cold acclimation (21 and 45 days) the two “antagonists” exerted clear opposite  
445 effects. This suggests that the observed effects of L-arginine on prolonged cold  
446 acclimation are NO-dependent. Thus, it seems likely that the L-arginine/NO producing  
447 pathway takes part in maintaining skeletal muscle oxidative phenotype, established  
448 during early cold acclimation, after the period of intensive shivering. This hypothesis is  
449 supported by our previous results (Petrovic et al., 2008), which showed a clear opposite  
450 effect of L-arginine and L-NAME on catalase and glutathione peroxidase activities on  
451 day 21 and 45 of cold exposure.

452 However, partial parallelism of the two physiological “antagonists”, observed  
453 during acute L-NAME treatment, requires further investigation. Similar parallel effects  
454 of L-arginine and L-NAME were reported previously in various (patho)physiological  
455 conditions (Henningsson et al., 2000; Vasilijevic et al., 2007). These analogous effects  
456 were attributed to the action of NO originating from non-enzymatic (Moroz et al., 1998)  
457 and iNOS-mediated (Henningsson et al., 2000) production in the presence of NOS  
458 inhibitors, or they may be related to other NO-independent metabolic effects of an L-  
459 arginine analog (Krippeit-Drews et al., 1996). Moreover, following *in vivo*  
460 administration of NOS inhibitors, the response may result from their systemic effects,  
461 and not only from local, peripheral effects (Bult et al., 1990; Jun et al., 1995). We noted  
462 during our previous study on the effects of L-NAME on brown adipose tissue (Petrovic  
463 et al., 2009; Vucetic et al., 2011), pancreas (Vasilijevic et al., 2007a, b) and white  
464 adipose tissue (Jankovic et al., 2009), that the response of specific physiological  
465 processes and their molecular basis were tissue-specific.

466 The present study highlighted the molecular mechanism underlying the shift in  
467 skeletal muscle metabolism to more oxidative mode, preferring lipids as an energy  
468 substrate during prolonged cold acclimation. This included upregulation of the PGC-  
469 1 $\alpha$ /PPARs transcriptional program in the early stage of cold acclimation which  
470 triggered the molecular recruitment of  $\beta$ -oxidation, the tricarboxylic acid cycle and  
471 OXPHOS. The established molecular basis of metabolic remodeling early on cold was  
472 maintained until the end of cold acclimation suggesting that the role of skeletal muscle  
473 in adaptation to cold is more than shivering and includes regulation of whole-body

474 energy homeostasis. Importantly, the L-arginine/NO producing pathway takes part in  
475 establishing the oxidative skeletal muscle phenotype during cold acclimation. Taken  
476 together with earlier studies highlighting the role of L-arginine in oxidative metabolism  
477 in skeletal muscle, our findings suggest that this amino acid holds promise as an  
478 effective nutrient which may improve the metabolic profile in skeletal muscle in obesity  
479 and type II diabetes.

480

#### 481 **Acknowledgments**

482 This work was supported by the Ministry of Education, Science and Technological  
483 development of the Republic of Serbia, Grants No 173054 and 173055.

484

485

486

487

488

489

490

491

492

493

494

495

496

497

498

499

500

501

502

503

504

505



506 **References:**

- 507 **Amin, R. H., Mathews, S.T., Camp, H.S., Ding, L. and Leff, T.** (2010). Selective  
508 activation of PPARgamma in skeletal muscle induces endogenous production of  
509 adiponectin and protects mice from diet-induced insulin resistance. *Am. J. Physiol.*  
510 *Endocrinol. Metab.* **298**, 28-37.
- 511 **Borgmann, U., Moon, T. W. and Laidler, K. J.** (1974). Molecular kinetics of beef  
512 heart lactate dehydrogenase. *Biochemistry* **13**, 5152-5158.
- 513 **Brevetti, L. S., Chang, D. S., Tang, G. L., Sarkar, R. and Messina, L. M.** (2003).  
514 Overexpression of endothelial nitric oxide synthase increases skeletal muscle blood  
515 flow and oxygenation in severe rat hind limb ischemia. *J. Vasc. Surg.* **38**, 820-826.
- 516 **Bruton, J. D., Aydin, J., Yamada, T., Shabalina, I. G., Ivarsson, N., Zhang, S. J.,**  
517 **Wada, M., Tavi, P., Nedergaard, J., Katz, A. et al.** (2010). Increased fatigue  
518 resistance linked to Ca<sup>2+</sup>-stimulated mitochondrial biogenesis in muscle fibres of cold-  
519 acclimated mice. *J. Physiol.* **588**, 4275-4288.
- 520 **Bult, H., Boeckxstaens, G. E., Pelckmans, P. A., Jordaens, F. H., Van Maercke, Y.**  
521 **M. and Herman, A. G.** (1990). Nitric oxide as an inhibitory non-adrenergic non-  
522 cholinergic neurotransmitter. *Nature* **345**, 346-347.
- 523 **de Castro Barbosa, T., Jiang, L. Q., Zierath, J. R. and Nunes, M. T.** (2013). L-  
524 Arginine enhances glucose and lipid metabolism in rat L6 myotubes via the NO/ c-GMP  
525 pathway. *Metabolism* **62**, 79-89.
- 526 **Ferré, P.** (2004). The biology of peroxisome proliferator-activated receptors:  
527 relationship with lipid metabolism and insulin sensitivity. *Diabetes* **53**, 43-50.
- 528 **Handschin, C., Chin, S., Li, P., Liu, F., Maratos-Flier, E., Lebrasseur, N. K., Yan,**  
529 **Z. and Spiegelman, B. M.** (2007). Skeletal muscle fiber-type switching, exercise  
530 intolerance, and myopathy in PGC-1alpha muscle-specific knock-out animals. *J. Biol.*  
531 *Chem.* **282**, 30014-30021.

- 532 **Heldmaier, G., Steinlechner, S., Ruf, T., Wiesinger, H. and Klingenspor, M.** (1989).  
533 Photoperiod and thermoregulation in vertebrates: body temperature rhythms and  
534 thermogenic acclimation. *J. Biol. Rhythms* **4**, 251-265.
- 535 **Henningsson, R., Alm, P., Lindström, E. and Lundquist, I.** (2000). Chronic blockade  
536 of NO synthase paradoxically increases islet NO production and modulates islet  
537 hormone release. *Am. J. Physiol. Endocrinol. Metab.* **279**, 95-107.
- 538 **Holst, D., Luquet, S., Nogueira, V., Kristiansen, K., Leverve, X. and Grimaldi, P.**  
539 **A.** (2003). Nutritional regulation and role of peroxisome proliferator-activated receptor  
540 delta in fatty acid catabolism in skeletal muscle. *Biochim. Biophys. Acta* **1633**, 43-50.
- 541 **Jäger, S., Handschin, C., St-Pierre, J. and Spiegelman, B. M.** (2007). AMP-activated  
542 protein kinase (AMPK) action in skeletal muscle via direct phosphorylation of PGC-  
543 1alpha. *Proc. Natl. Acad. Sci. U S A* **104**, 12017-12022.
- 544 **Janković, A., Buzadžić, B., Korać, A., Petrović, V., Vasiljević, A. and Korać B.**  
545 (2009). Antioxidative defense organization in retroperitoneal white adipose tissue  
546 during acclimation to cold-The involvement of L-arginine/NO pathway. *J. Therm. Biol.*  
547 **34**, 58-65.
- 548
- 549 **Jankovic, A., Korac, A., Buzadzic, B., Otasevic, V., Stancic, A., Vucetic, M.,**  
550 **Markelic, M., Velickovic, K., Golic, I. and Korac B.** (2013). Endocrine and metabolic  
551 signaling in retroperitoneal white adipose tissue remodeling during cold acclimation. *J.*  
552 *Obes.* doi: 10.1155/2013/937572.
- 553 **Jobgen, W. S., Fried, S. K., Fu, W. J., Meininger, C. J. and Wu, G.** (2006).  
554 Regulatory role for the arginine-nitric oxide pathway in metabolism of energy  
555 substrates. *J. Nutr. Biochem.* **17**, 571-588.
- 556 **Jun, T., Sakinis, A. and Wennmalm, A.** (1995). The insulin secretory response to  
557 intravenous glucose in the rat is independent of NO formation. *Acta Physiol. Scand.*  
558 **155**, 61-65.

- 559 **Krippeit-Drews, P., Welker, S. and Drews, G.** (1996). Effects of nitric oxide synthase  
560 inhibitor Nx nitro-L-arginine methyl ester on electrical activity and ion channels of  
561 mouse pancreatic B cells. *Biochem. Biophys. Res. Commun.* **224**, 199-205.
- 562 **Lee-Young, R. S., Ayala, J. E., Hunley, C. F., James, F. D., Bracy, D. P., Kang, L.**  
563 **and Wasserman, D. H.** (2010). Endothelial nitric oxide synthase is central to skeletal  
564 muscle metabolic regulation and enzymatic signaling during exercise in vivo. *Am. J.*  
565 *Physiol. Regul. Integr. Comp. Physiol.* **298**, 1399-1408.
- 566 **Lowry, O. H., Rosenbrough, N. J., Farr, A. L. and Randall, R. J.** (1951). Protein  
567 measurement with the Folin phenol reagent. *J. Biol. Chem.* **193**, 265-275.
- 568 **Maréchal, G. and Gailly, P.** (1999). Effects of nitric oxide on the contraction of  
569 skeletal muscle. *Cell Mol. Life Sci.* **55**, 1088-1102.
- 570 **McClelland, G. B.** (2004). Fat to the fire: the regulation of lipid oxidation with exercise  
571 and environmental stress. *Comp. Biochem. Physiol. B Biochem. Mol. Biol.* **139**, 443-  
572 460.
- 573 **Meyer, C. W., Willershäuser, M., Jastroch, M., Rourke, B. C., Fromme, T.,**  
574 **Oelkrug, R., Heldmaier, G. and Klingenspor, M.** (2010). Adaptive thermogenesis  
575 and thermal conductance in wild-type and UCP1-KO mice. *Am. J. Physiol. Regul.*  
576 *Integr. Comp. Physiol.* **299**, 1396-1406.
- 577 **Mineo, P. M., Cassell, E. A., Roberts, M. E. and Schaeffer, P. J.** (2012). Chronic  
578 cold acclimation increases thermogenic capacity, non-shivering thermogenesis and  
579 muscle citrate synthase activity in both wild-type and brown adipose tissue deficient  
580 mice. *Comp. Biochem. Physiol. A Mol. Integr. Physiol.* **161**, 395-400.
- 581 **Moroz, L. L., Norby, S. W., Cruz, L., Sweedler, J. V., Gillette, R. and Clarkson R.**  
582 **B.** (1998). Non-enzymatic production of nitric oxide (NO) from NO synthase inhibitors.  
583 *Biochem. Biophys. Res. Commun.* **253**, 571-576.
- 584 **Mukherjee, R., Jow, L., Croston, G. E. and Paterniti, J. R. Jr.** (1997). Identification,  
585 characterization, and tissue distribution of human peroxisome proliferator-activated

586 receptor (PPAR) isoforms PPAR $\gamma$ 2 versus PPAR $\gamma$ 1 and activation with  
587 retinoid X receptor agonists and antagonists. *J. Biol. Chem.* **272**, 8071-8076.

588 **Oliveira, R. L., Ueno, M., de Souza, C. T., Pereira-da-Silva, M., Gasparetti, A. L.,**  
589 **Bezzera, R. M., Alberici, L. C., Vercesi, A. E., Saad, M. J. and Velloso, L. A.**  
590 (2004). Cold-induced PGC-1 $\alpha$  expression modulates muscle glucose uptake through  
591 an insulin receptor/Akt-independent, AMPK-dependent pathway. *Am. J. Physiol.*  
592 *Endocrinol. Metab.* **287**, 686-695.

593 **Peralta, J. G., Finocchietto, P. V., Converso, D., Schöpfer, F., Carreras, M. C. and**  
594 **Poderoso, J. J.** (2003). Modulation of mitochondrial nitric oxide synthase and energy  
595 expenditure in rats during cold acclimation. *Am. J. Physiol. Heart. Circ. Physiol.* **284**,  
596 2375-2383.

597

598 **Petrovic, V., Buzadzic, B., Korac, A., Vasiljevic, A., Jankovic, A., Micunovic, K.**  
599 **and Korac, B.** (2008). Antioxidative defence alterations in skeletal muscle during  
600 prolonged acclimation to cold: role of L-arginine/NO-producing pathway. *J. Exp. Biol.*  
601 **211**, 114-120.

602

603 **Petrović, V., Buzadžić, B., Korać, A., Vasiljević, A., Janković, A. and Korać, B.**  
604 (2010). NO modulates the molecular basis of rat interscapular brown adipose tissue  
605 thermogenesis. *Comp. Biochem. Physiol. C Toxicol. Pharmacol.* **152**, 147-159.

606 **Petrović, V., Buzadžić, B., Korać, A., Vasiljević, A., Janković, A. and Korać, B.**  
607 (2009). l-Arginine supplementation induces glutathione synthesis in interscapular brown  
608 adipose tissue through activation of glutamate-cysteine ligase expression: The role of  
609 nitric oxide. *Chem. Biol. Interact.* **182**, 204-212.

610 **Puigserver, P., Wu, Z., Park, C. W., Graves, R., Wright, M. and Spiegelman, B. M.**  
611 (1998). A cold-inducible coactivator of nuclear receptors linked to adaptive  
612 thermogenesis. *Cell* **92**, 829-839.

- 613 **Saha, S. K., Ohinata, H. and Kuroshima, A.** (1996). Effects of acute and chronic  
614 inhibition of nitric oxide synthase on brown adipose tissue thermogenesis. *Jpn. J.*  
615 *Physiol.* **46**, 375-382.
- 616 **Schaeffer, P. J., Villarin, J. J. and Lindstedt, S. L.** (2003). Chronic cold exposure  
617 increases skeletal muscle oxidative structure and function in *Monodelphis domestica*, a  
618 marsupial lacking brown adipose tissue. *Physiol. Biochem. Zool.* **76**, 877-887.
- 619 **Seebacher, F. and Glanville, E. J.** (2010). Low levels of physical activity increase  
620 metabolic responsiveness to cold in a rat (*Rattus fuscipes*). *PLoS One* **5**, e13022.
- 621 **Tunstall, R. J., Mehan, K. A., Wadley, G. D., Collier, G. R., Bonen, A., Hargreaves,**  
622 **M. and Cameron-Smith, D.** (2002). Exercise training increases lipid metabolism gene  
623 expression in human skeletal muscle. *Am. J. Physiol. Endocrinol. Metab.* **283**, 66-72.
- 624 **Vaillancourt, E., Haman, F. and Weber, J. M.** (2009). Fuel selection in Wistar rats  
625 exposed to cold: shivering thermogenesis diverts fatty acids from re-esterification to  
626 oxidation. *J. Physiol.* **587**, 4349-4359.
- 627 **Vallerand, A. L., Pérusse, F. and Bukowiecki, L. J.** (1990). Stimulatory effects of  
628 cold exposure and cold acclimation on glucose uptake in rat peripheral tissues. *Am. J.*  
629 *Physiol.* **259**, 1043-1049.
- 630 **Vasilijević, A., Buzadzić, B., Korać, A., Petrović, V., Janković, A., Mićunović, K.**  
631 **and Korać, B.** (2007). The effects of cold acclimation and nitric oxide on antioxidative  
632 enzymes in rat pancreas. *Comp. Biochem. Physiol. C Toxicol. Pharmacol.* **145**, 641-  
633 647a.
- 634 **Vasilijevic, A., Buzadzic, B., Korac, A., Petrovic, V., Jankovic, A. and Korac, B.**  
635 (2007). Beneficial effects of L-arginine nitric oxide-producing pathway in rats treated  
636 with alloxan. *J. Physiol.* **584**, 921-933b.
- 637 **Vucetic, M., Otasevic, V., Korac, A., Stancic, A., Jankovic, A., Markelic, M., Golic,**  
638 **I., Velickovic, K., Buzadzic, B. and Korac, B.** (2011). Interscapular brown adipose

639 tissue metabolic reprogramming during cold acclimation: Interplay of HIF-1 $\alpha$  and  
640 AMPK $\alpha$ . *Biochim. Biophys. Acta* **1810**, 1252-1261.

641 **Weber, J. M.** (2011). Metabolic fuels: regulating fluxes to select mix. *J. Exp. Biol.* **214**,  
642 286-294.

643 **Wu, Z., Puigserver, P., Andersson, U., Zhang, C., Adelmant, G., Mootha, V., Troy,**  
644 **A., Cinti, S., Lowell, B., Scarpulla, R. C. and Spiegelman, B. M.** (1999).  
645 Mechanisms controlling mitochondrial biogenesis and respiration through the  
646 thermogenic coactivator PGC-1. *Cell* **98**, 115-124.

647 **Yoon, M. J., Lee, G. Y., Chung, J. J., Ahn, Y. H., Hong, S. H. and Kim, J. B.**  
648 (2006). Adiponectin increases fatty acid oxidation in skeletal muscle cells by sequential  
649 activation of AMP-activated protein kinase, p38 mitogen-activated protein kinase, and  
650 peroxisome proliferator-activated receptor alpha. *Diabetes* **55**, 2562-2570.

651

652

653

654

655

656

657

658

659

660

661

662

663

664

665

666

667

668

669 **Figure legends:**

670 **Fig. 1.** Changes in the expression of PGC-1 $\alpha$  (A), PPAR $\delta$  (B), PPAR $\alpha$  (C) and PPAR $\gamma$   
671 (D) in skeletal muscle of untreated, L-arginine-treated and L-NAME-treated animals  
672 during cold acclimation. Data showing protein levels, expressed related to a control  
673 acclimated to room temperature taken as 100%, represents the mean  $\pm$  S.E.M. of three  
674 independent experiments. \*Compared to control, \*  $P < 0.05$ ; \*\*  $P < 0.01$ ; \*\*\*  $P <$   
675 0.001; #Compared to untreated rats during the same period of cold acclimation, #  $P <$   
676 0.05; ##  $P < 0.01$ ; ###  $P < 0.001$ .

677 **Fig. 2.** Time course of changes in the expression of complex I (A), cytochrome *c* (B)  
678 and ATP synthase (C) in skeletal muscle of untreated, L-arginine-treated and L-NAME-  
679 treated animals during cold acclimation. Protein content is expressed relative to a  
680 control acclimated to room temperature, which was standardized as 100%. The results  
681 of a representative example from three observations are shown. The values represent the  
682 mean  $\pm$  S.E.M. \*Compared to control, \*  $P < 0.05$ ; \*\*  $P < 0.01$ ; \*\*\*  $P < 0.001$ ;  
683 #Compared to untreated rats during the same period of cold acclimation, #  $P < 0.05$ ; ###  
684  $P < 0.001$ .

685 **Fig. 3.** Time-dependent changes in the protein expression of GAPDH (A), hexokinase II  
686 (B), PYGB (C) and activity of LDH (D) in skeletal muscle of untreated, L-arginine-  
687 treated and L-NAME-treated animals during cold acclimation. The results of the  
688 representative experiment and densitometric analysis are shown. The obtained data for  
689 protein content was expressed as a % of the control taken as 100% and represents the  
690 mean  $\pm$  S.E.M. of three independent experiments. \*Compared to control, \*  $P < 0.05$ ; \*\*  
691  $P < 0.01$ ; \*\*\*  $P < 0.001$ ; #Compared to untreated rats during the same period of cold  
692 acclimation, #  $P < 0.05$ ; ##  $P < 0.01$ ; ###  $P < 0.001$ .

693 **Fig. 4.** Expression profiles of ACADM (A) and SCAS (B) in skeletal muscle of  
694 untreated, L-arginine-treated and L-NAME-treated animals during cold acclimation.  
695 Data showing protein levels, expressed related to a control acclimated to room  
696 temperature taken as 100%, represents the mean  $\pm$  S.E.M. of three independent  
697 experiments. \*Compared to control, \*  $P < 0.05$ ; \*\*  $P < 0.01$ ; \*\*\*  $P < 0.001$ ; #Compared  
698 to untreated rats during the same period of cold-acclimation, #  $P < 0.05$ ; ###  $P < 0.001$ .

699 **Fig. 5.** Changes in the expression of AMPK $\alpha$  protein in skeletal muscle of untreated, L-  
700 arginine-treated and L-NAME-treated animals during cold acclimation. Data obtained  
701 after quantification of AMPK $\alpha$  bands and expressed as a % of the control taken as  
702 100%, represents the mean  $\pm$  S.E.M. of three independent experiments. \*Compared to  
703 control, \*  $P < 0.05$ ; \*\*  $P < 0.01$ ; \*\*\*  $P < 0.001$ ; #Compared to untreated rats during the  
704 same period of cold-acclimation, #  $P < 0.05$ ; ##  $P < 0.01$ ; ###  $P < 0.001$ .



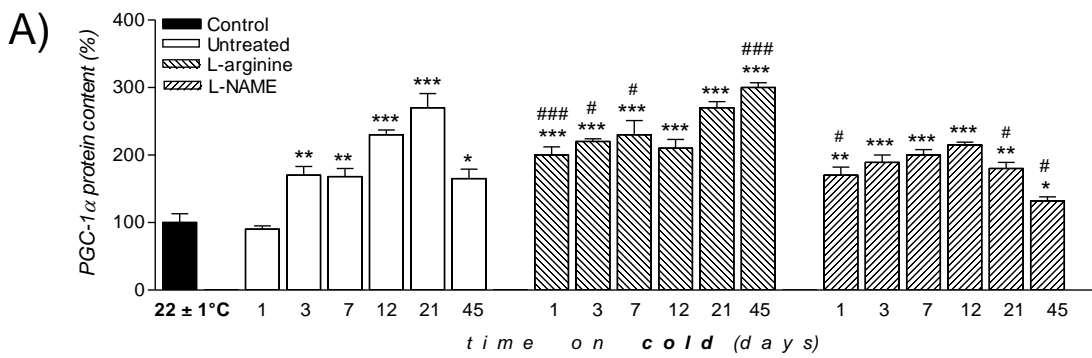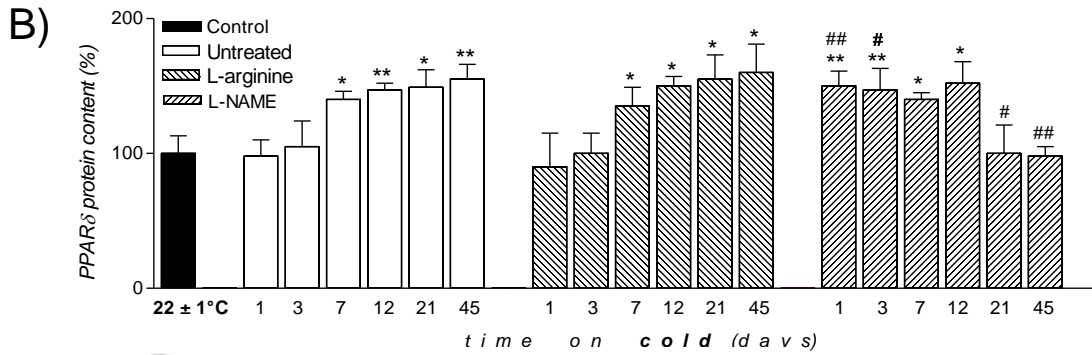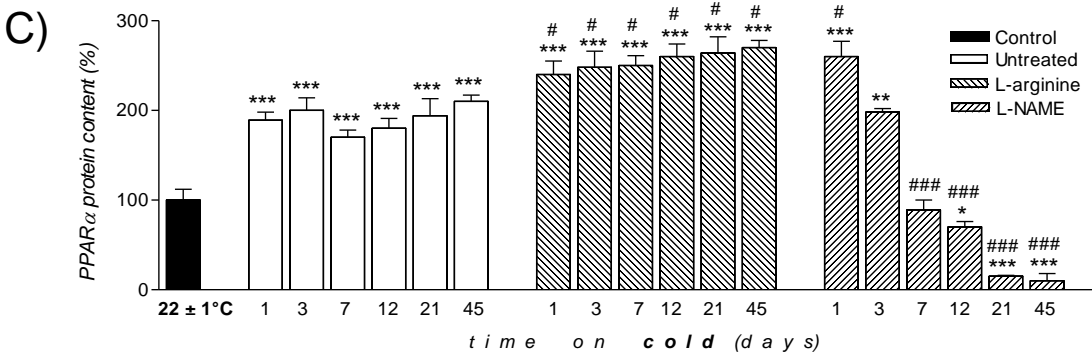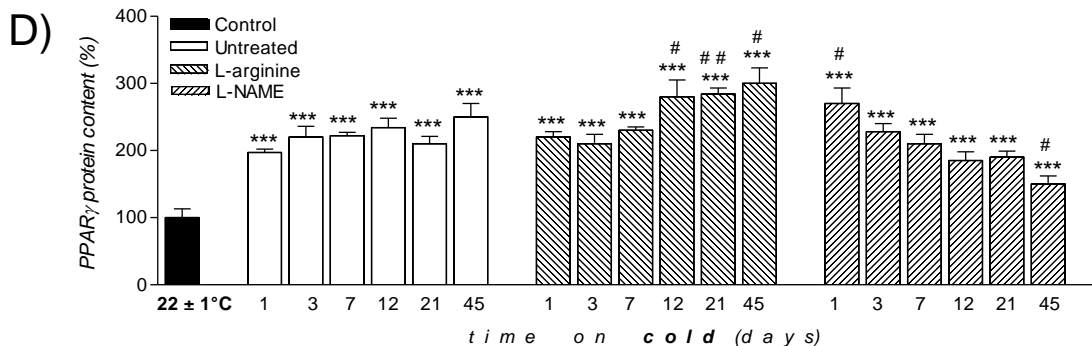

$\beta$ -actin

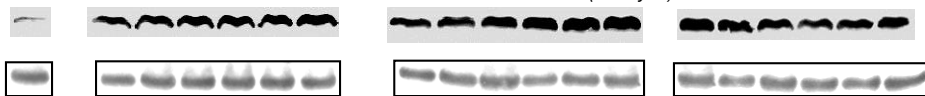

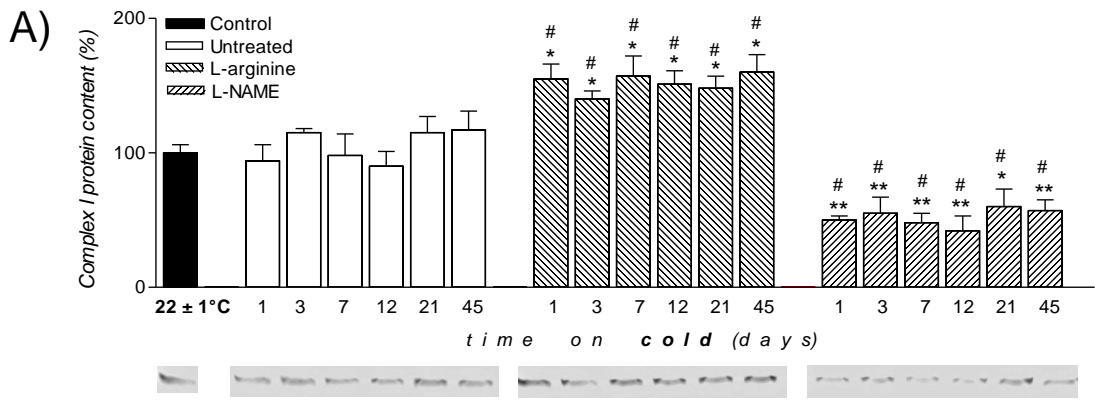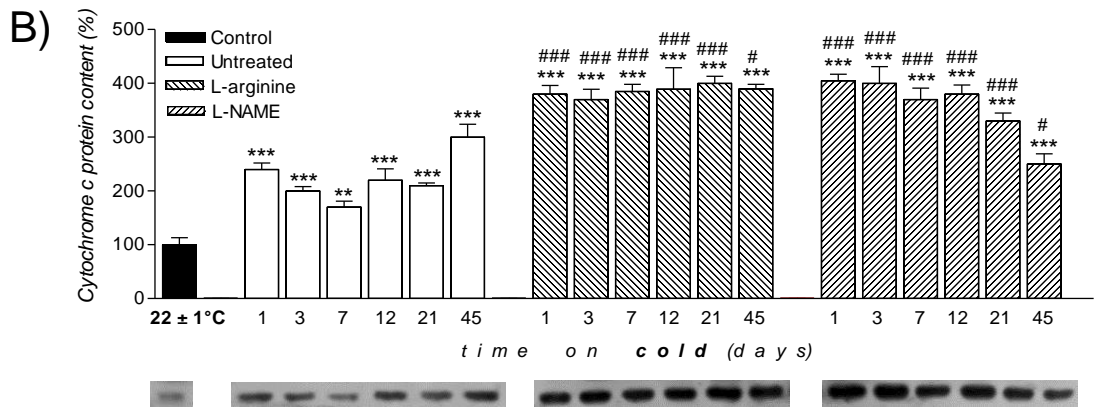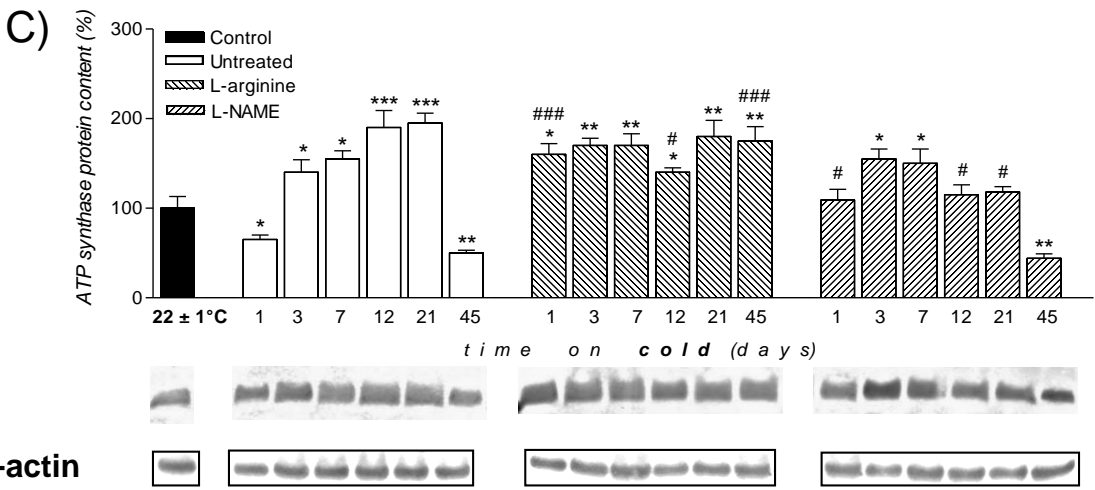

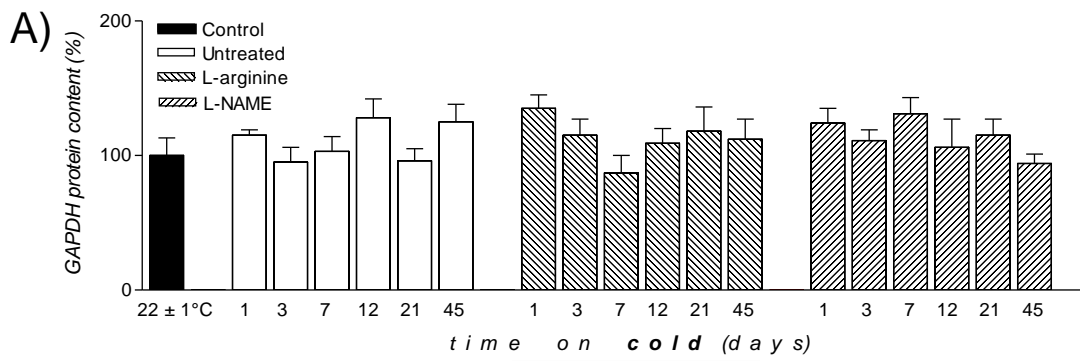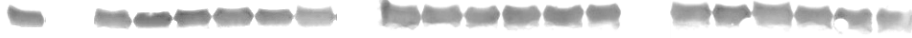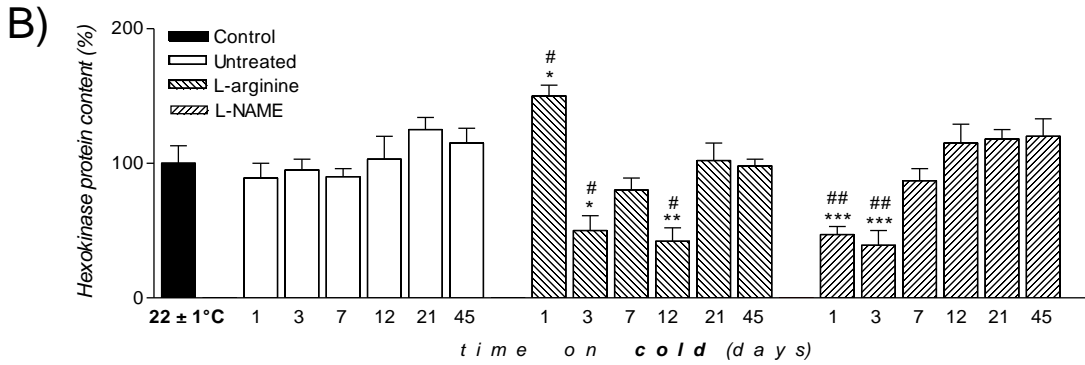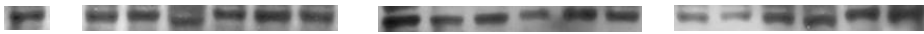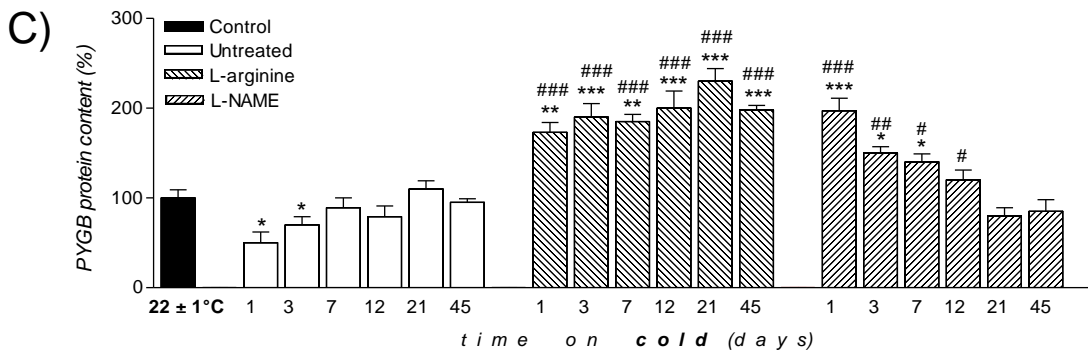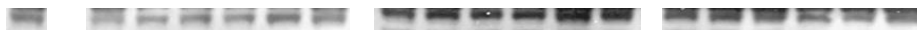

**β-actin**

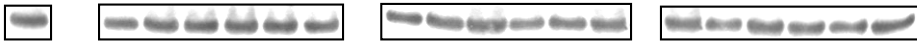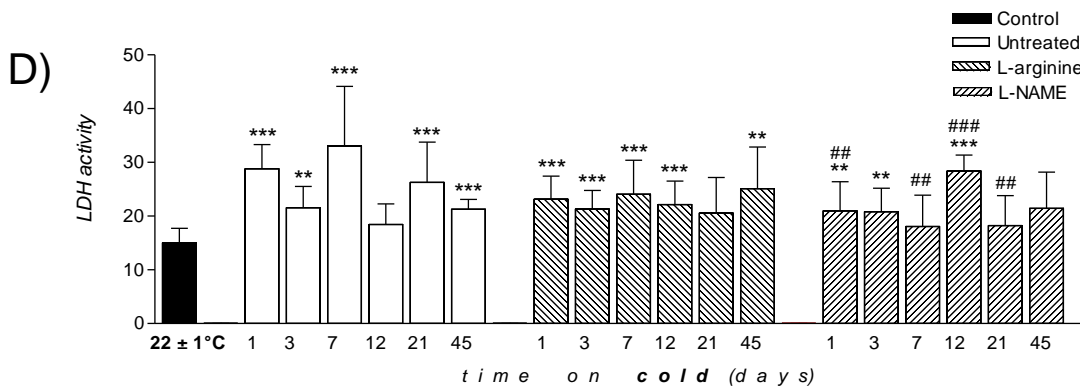

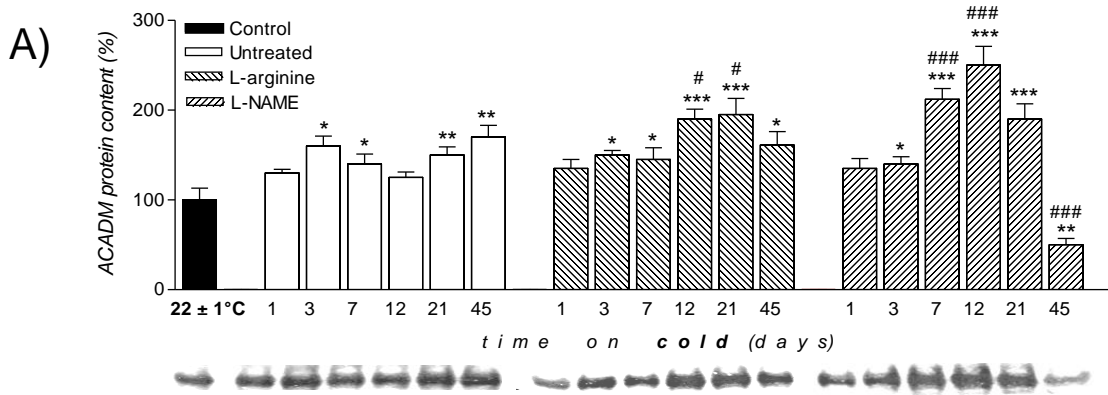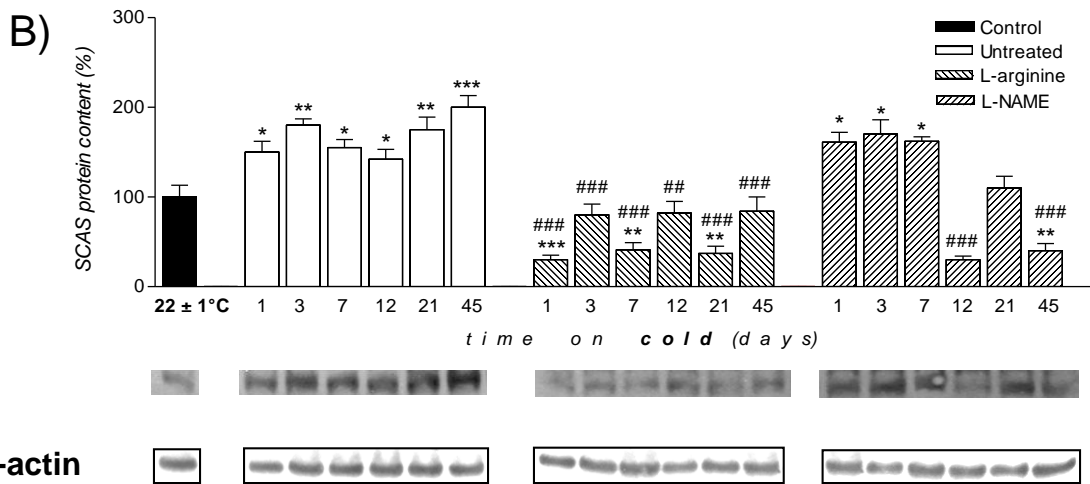

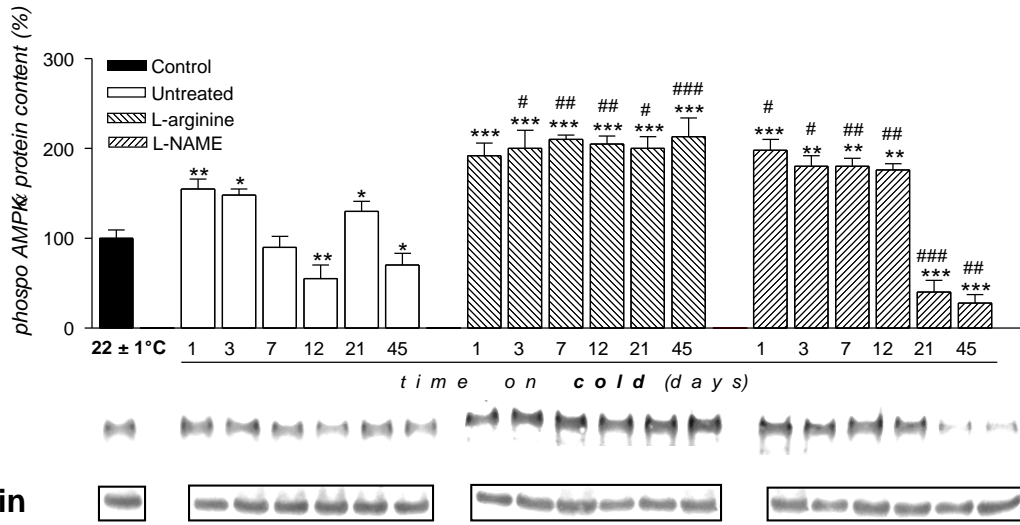

Source: https://cob.silverchair.com/jeb/article-pdf/doi/10.1242/jeb.089334/2037044/jeb_089334.pdf
